# Supplementary material for: A Study of the Interaction between Xanthine Oxidase and Its Inhibitors from Chrysanthemum morifolium Using Computational Simulation and Multispectroscopic Methods
Source: MDPI journal article supplement (doi:10.3390/metabo13010113), 2023-01-09
Supplement: s1 [file s1]

**Table S1.** XO inhibitory activity of inhibitors identified from *C. morifolium* extracts.

| Inhibitor                   | XO inhibition (%)         |
|-----------------------------|---------------------------|
| Homovanillic acid           | 30.00 ± 2.18 <sup>c</sup> |
| <i>Trans</i> -cinnamic acid | 57.63 ± 6.00 <sup>b</sup> |
| Kaempferol                  | 81.87 ± 3.31 <sup>a</sup> |
| Apigenin                    | 56.60 ± 1.77 <sup>b</sup> |
| Ethyl acetate fraction      | 34.92 ± 1.27 <sup>c</sup> |
| Allopurinol                 | 96.48 ± 2.40 <sup>a</sup> |

Values are expressed as mean ± SEM. The data was performed in triplicates (n = 3). Means with different superscript letters show significant difference ( $p \leq 0.05$ , ANOVA, Tukey HSD's Post Hoc Test). Percentage of inhibition was measured at 100 µg/mL.
