# Supplementary material for: A Study of the Interaction between Xanthine Oxidase and Its Inhibitors from Chrysanthemum morifolium Using Computational Simulation and Multispectroscopic Methods
Source: MDPI journal article supplement (doi:10.3390/metabo13010113), 2023-01-09
Supplement: s1 [file s1]

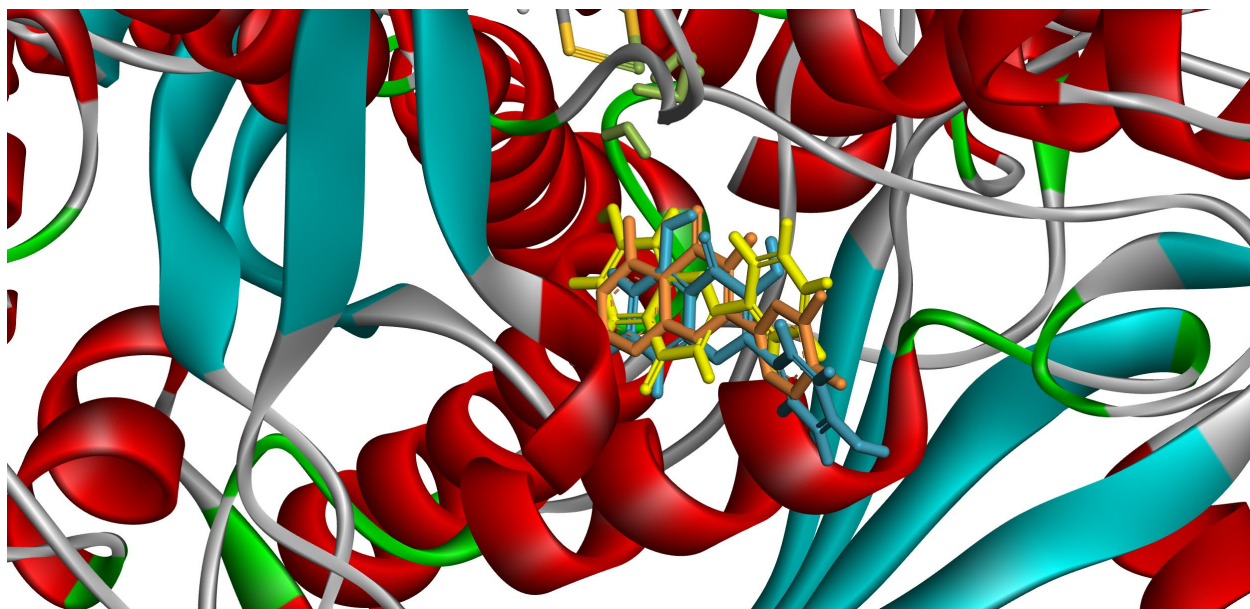

**Figure S3.** The 3D molecular of XO displaying the respective binding of kaempferol (blue), apigenin (yellow), and quercetin (orange) at the active pocket.
