# Supplementary material for: A Study of the Interaction between Xanthine Oxidase and Its Inhibitors from Chrysanthemum morifolium Using Computational Simulation and Multispectroscopic Methods
Source: MDPI journal article supplement (doi:10.3390/metabo13010113), 2023-01-09
Supplement: s1 [file s1]

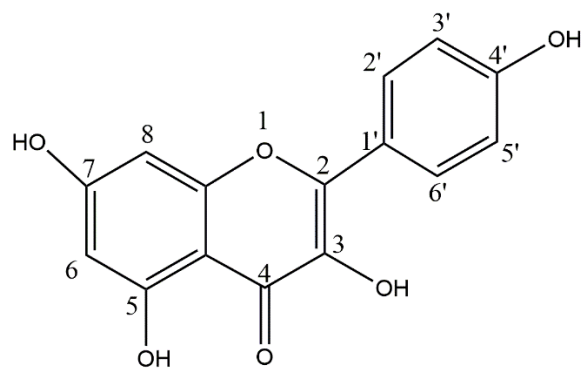

(a)

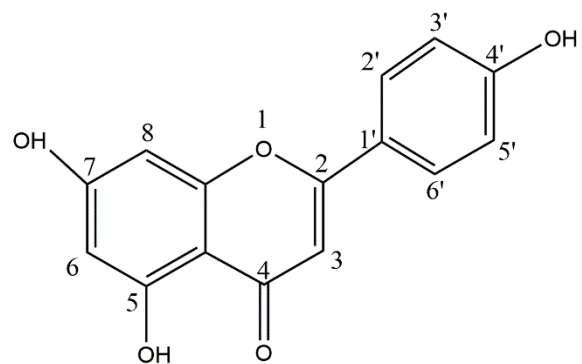

(b)

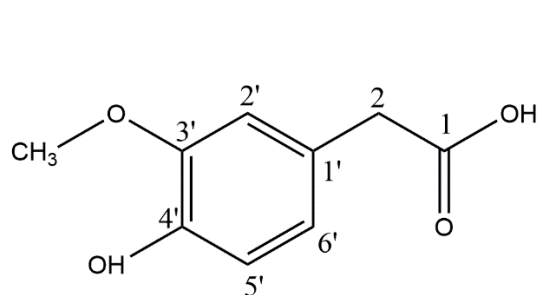

(c)

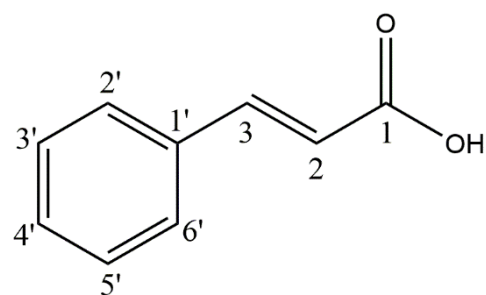

(d)

**Figure S2.** Chemical structure of (a) kaempferol, (b) apigenin, (c) homovanillic acid, and (d) *trans*-cinnamic acid.
