# Supplementary material for: A Study of the Interaction between Xanthine Oxidase and Its Inhibitors from Chrysanthemum morifolium Using Computational Simulation and Multispectroscopic Methods
Source: MDPI journal article supplement (doi:10.3390/metabo13010113), 2023-01-09
Supplement: s1 [file s1]

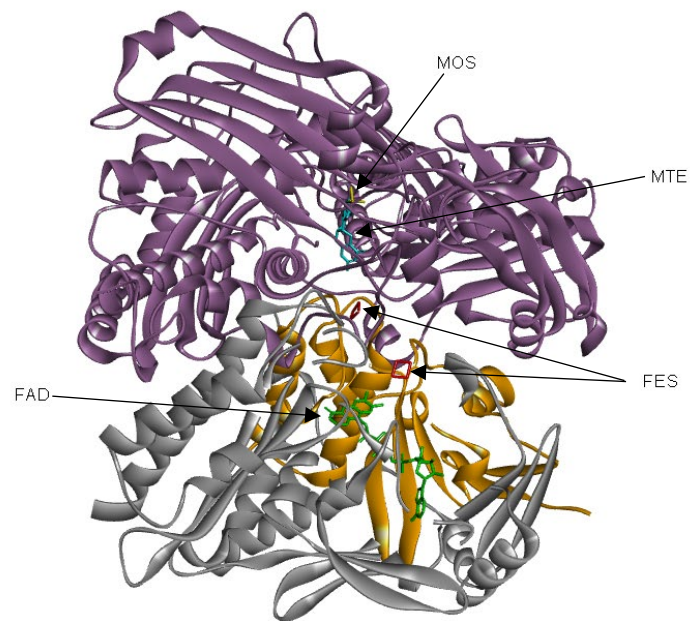

**Figure S1.** 3D structure of xanthine oxidase. Chain A, B and C are colored in orange, grey and purple respectively. The bound FAD (green), Fe-S cluster (red), MTE (blue) and MOS (yellow) are indicated.
